# Supplementary material for: Crystal structure, assembly process, and single-molecule magnet behavior of a triangular prismatic {Co9} cluster
Source: Royal Society of Chemistry journal article supplement (doi:10.1039/d2dt02468c), 2022-01-01
Supplement: d2dt02468c1.pdf [file d2dt02468c1.pdf]

## Supporting Information

# Crystal Structure, Assembly Process, and Single-Molecule Magnet Behavior of A Triangular Prismatic {Co<sub>9</sub>} Cluster

Ye Tao,<sup>a</sup> Lu-Na Wang,<sup>a</sup> Hai-Ye Li,<sup>a</sup> Xiao-Huan Qin,<sup>a</sup> Di Yao,<sup>a</sup> and Fu-Ping Huang<sup>\*a</sup>

<sup>a</sup> State Key Laboratory for Chemistry and Molecular Engineering of Medicinal Resources, School of Chemistry and Pharmaceutical Sciences, Guangxi Normal University, Guilin 541004, P. R. China. E-mail: huangfp2010@163.com;

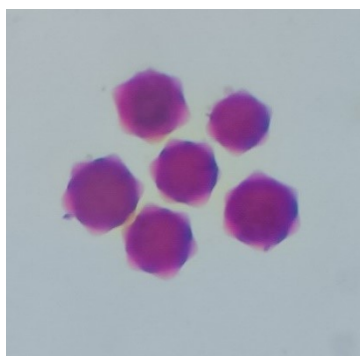

**Fig. S1** The crystal photograph of {Co<sub>9</sub>}-Eg.

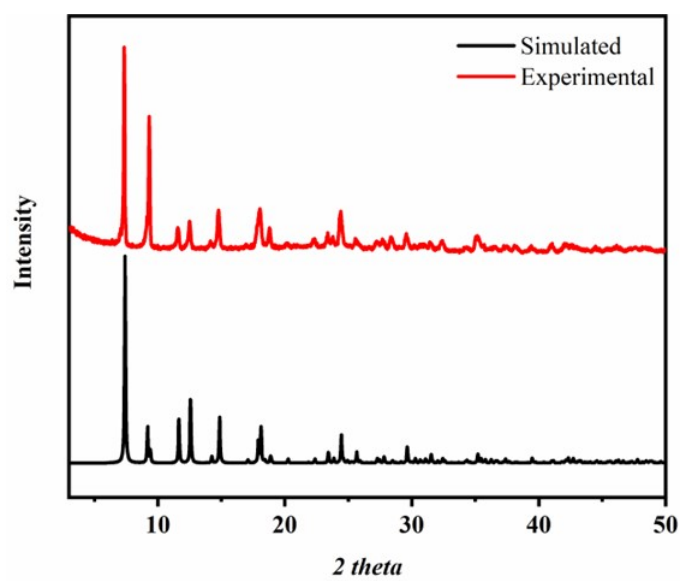

**Fig. S2** Powdered X-ray diffraction (XRD) patterns of {Co<sub>9</sub>}-Eg.

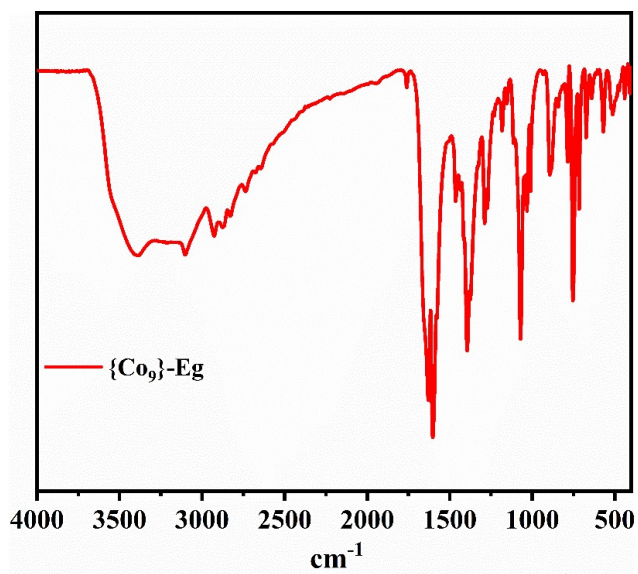

**Fig. S3** Fourier transform Infrared (FT-IR) spectrum of {Co<sub>9</sub>}-Eg.

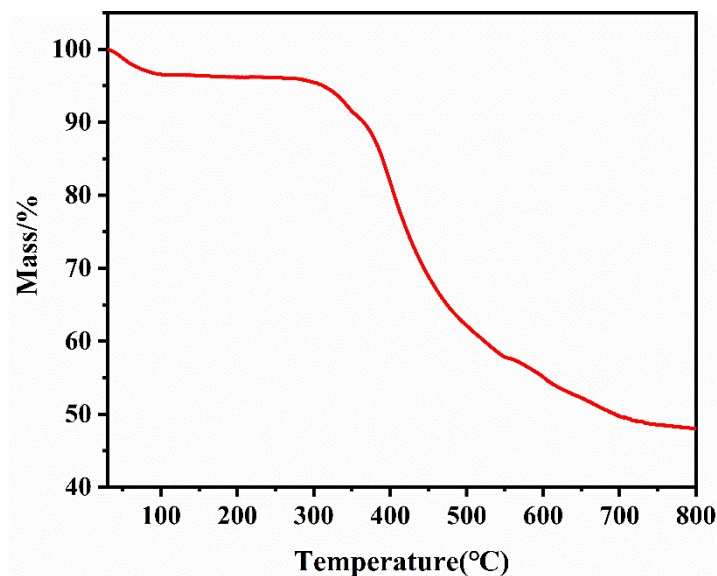

**Fig. S4** The TGA plot of {Co<sub>9</sub>}-Eg.

**Table S1.** Crystallographic data and refinement parameters for {Co<sub>9</sub>}-Eg (squeeze).

| Identification code                   | {Co <sub>9</sub> }-Eg                                                           |
|---------------------------------------|---------------------------------------------------------------------------------|
| Empirical formula                     | Co <sub>9</sub> C <sub>60</sub> H <sub>48</sub> N <sub>24</sub> O <sub>24</sub> |
| Formula weight (M)                    | 2019.55                                                                         |
| Crystal system                        | trigonal                                                                        |
| Space group                           | <i>R</i> - $\bar{3}c$                                                           |
| a (Å)                                 | 15.1762(6)                                                                      |
| b (Å)                                 | 15.1762(6)                                                                      |
| c (Å)                                 | 56.387(4)                                                                       |
| $\alpha$ (°)                          | 90                                                                              |
| $\beta$ (°)                           | 90                                                                              |
| $\gamma$ (°)                          | 120                                                                             |
| V/( Å <sup>3</sup> )                  | 11246.9(13)                                                                     |
| Z                                     | 6                                                                               |
| D <sub>c</sub> ( Mg m <sup>-3</sup> ) | 1.789                                                                           |
| F(000)                                | 6066                                                                            |
| Reflections collected                 | 16568/3039                                                                      |
| /unique                               | R(int) = 0.0655                                                                 |
| Goodness-of-fit on F <sup>2</sup>     | 1.010                                                                           |
| Final R indices                       | R <sub>1</sub> = 0.0681                                                         |
| I > 2 $\sigma$ (I)                    | $\omega$ R <sub>2</sub> = 0.1824                                                |
| R indices                             | R <sub>1</sub> = 0.1324                                                         |
| (all data)                            | $\omega$ R <sub>2</sub> = 0.2355                                                |

**Table S2.** Selected bond length and bond angle for {Co<sub>9</sub>}-Eg.

| <b>{Co<sub>9</sub>}-Eg.</b> (A) $-y+1, x-y, z$ ; (B) $-x+4/3, -x+y+2/3, -z+1/6$ ; (C) $y+1/3, x-1/3, -z+1/6$ ; |             |             |            |
|----------------------------------------------------------------------------------------------------------------|-------------|-------------|------------|
| <b>Atomic Distances [Å]</b>                                                                                    |             |             |            |
| Co1—O1                                                                                                         | 2.079 (5)   | Co1—N3A     | 2.263 (5)  |
| Co1—O3                                                                                                         | 1.947 (4)   | Co2—O3      | 1.886 (4)  |
| Co1—O4                                                                                                         | 2.168 (7)   | Co2—O3B     | 1.885 (4)  |
| Co1—N1                                                                                                         | 2.043 (5)   | Co2—N4C     | 1.998 (5)  |
| Co1—N2                                                                                                         | 2.403 (5)   | Co2—N4A     | 1.998 (5)  |
| <b>Bond Angles [°]</b>                                                                                         |             |             |            |
| O1—Co1—O4                                                                                                      | 88.8 (2)    | N1—Co1—O4   | 89.4 (2)   |
| O1—Co1—N2                                                                                                      | 152.66 (19) | N1—Co1—N2   | 74.9 (2)   |
| O1—Co1—N3A                                                                                                     | 103.91 (19) | N1—Co1—N3A  | 101.4 (2)  |
| O3—Co1—O1                                                                                                      | 103.81 (19) | N3i—Co1—N2  | 83.25 (18) |
| O3—Co1—O4                                                                                                      | 80.0 (2)    | O3—Co2—O3B  | 111.6 (3)  |
| O3—Co1—N1                                                                                                      | 169.3 (2)   | O3—Co2—N4A  | 99.06 (19) |
| O3—Co1—N2                                                                                                      | 102.70 (19) | O3—Co2—N4C  | 124.0 (2)  |
| O3—Co1—N3A                                                                                                     | 88.58 (19)  | O3B—Co2—N4C | 99.06 (19) |
| O4—Co1—N2                                                                                                      | 89.3 (2)    | O3B—Co2—N4A | 124.0 (2)  |
| O4—Co1—N3A                                                                                                     | 164.7 (2)   | N4A—Co2—N4C | 100.8 (3)  |
| N1—Co1—O1                                                                                                      | 77.8 (2)    |             |            |

**Table S3.** Continuous Shape Measures (CShM) for Co<sup>II</sup> centres using SHAPE.

| <b>{Co<sub>9</sub>}-Eg</b> | Co1                                                                                 | Co2                                                                                   |
|----------------------------|-------------------------------------------------------------------------------------|---------------------------------------------------------------------------------------|
|                            | [CoN3O3]                                                                            | [CoN2O2]                                                                              |
|                            | 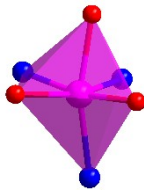 |  |
|                            | octahedron                                                                          | tetrahedron                                                                           |
|                            | 2.755                                                                               | 1.818                                                                                 |

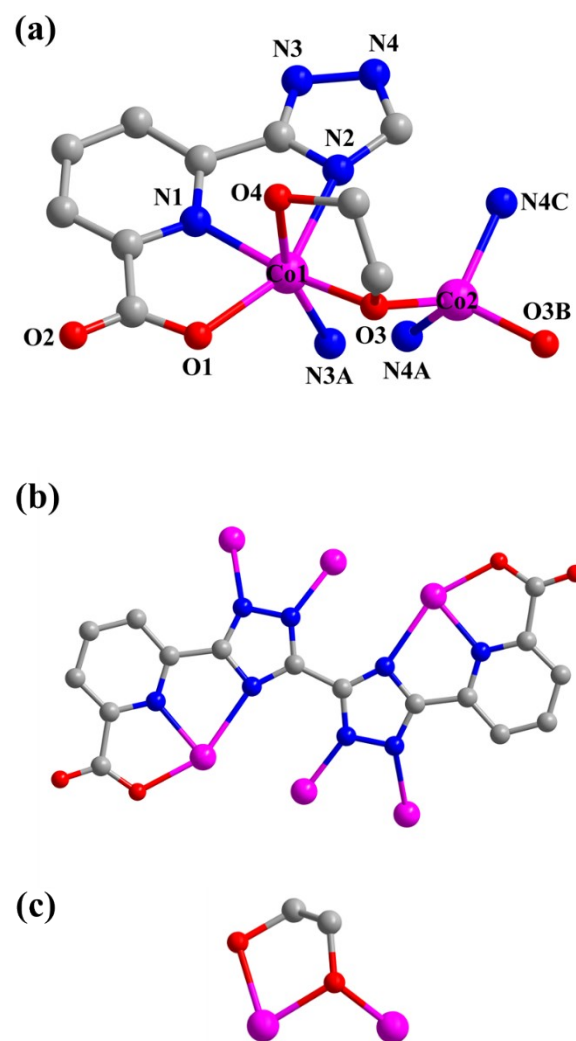

**Fig. S5** (a) Coordination environment diagram of  $\{\text{Co}_9\}$ -Eg. Coordination modes of ligands  $\text{L}^4$  (b) and  $\text{EgO}_2\text{H}^-$  (c).

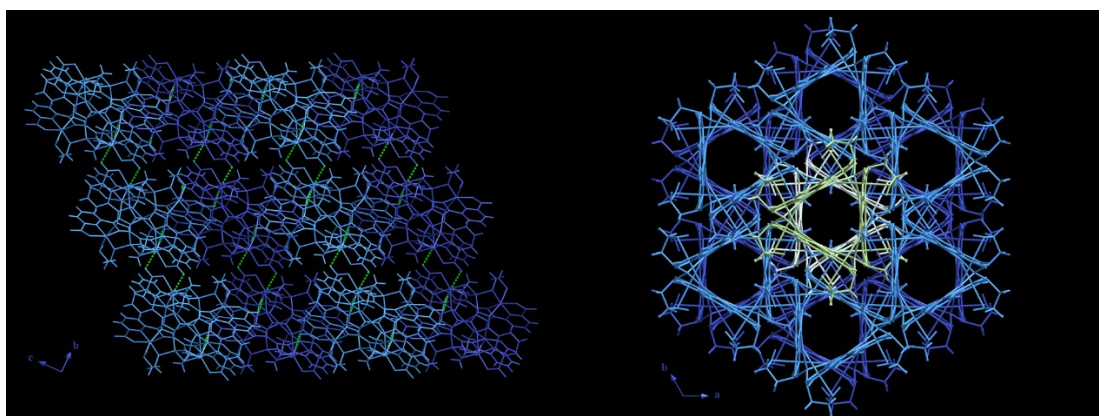

**Fig. S6** The packing arrangement of  $\{\text{Co}_9\}$ -Eg along the a-(left) and c-axis (right) directions, respectively.

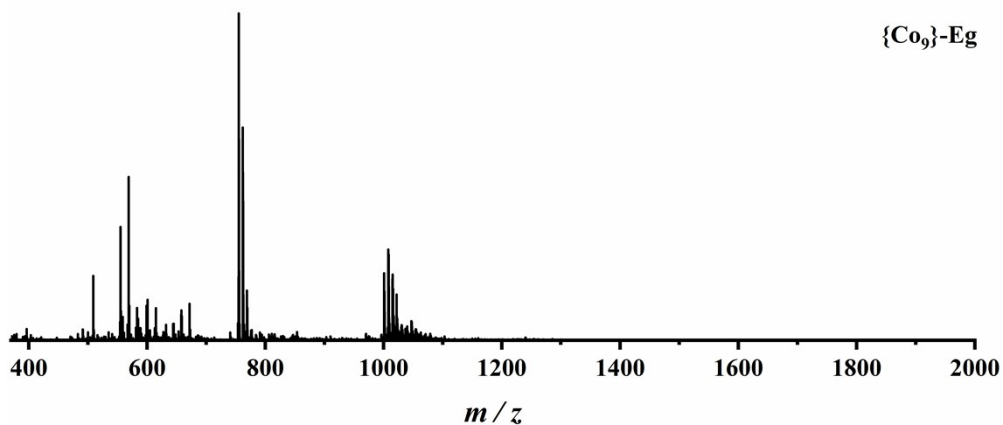

**Fig. S7** Negative ESI-MS spectra of  $\{\text{Co}_9\}$ -Eg in  $\text{H}_2\text{O}$  (In-Source CID = 0 eV).

**Table S4.** Major species assigned in the ESI-MS in Negative mode.

| $\{\text{Co}_9\}$ -Eg (In-Source CID 0 eV)                                                        |                    |                |                  |
|---------------------------------------------------------------------------------------------------|--------------------|----------------|------------------|
| Peaks                                                                                             | Relative Intensity |                |                  |
| Typical Composition                                                                               | Intensity          | Observed $m/z$ | Calculated $m/z$ |
| $[\text{Co}_2\text{L}(\text{OH})]^-$                                                              | 0.20               | 508.92         | 508.92           |
| $[\text{Co}_2\text{L}(\text{OH})(\text{HCOOH})]^-$                                                | 0.35               | 554.92         | 554.93           |
| $[\text{Co}_2\text{L}(\text{CH}_3\text{O})(\text{HCOOH})]^-$                                      | 0.50               | 568.94         | 568.94           |
| $[\text{Co}_2\text{L}(\text{HCOO})(\text{HCOOH})]^-$                                              | 0.10               | 582.92         | 582.92           |
| $[\text{Co}_2\text{L}(\text{HCOO})(\text{HCOOH})(\text{H}_2\text{O})]^-$                          | 0.12               | 600.93         | 600.93           |
| $[\text{Co}_3\text{L}(\text{HCOO})(\text{CH}_3\text{O})(\text{OH})]^-$                            | 0.05               | 643.87         | 643.87           |
| $[\text{Co}_3\text{L}(\text{HCOO})_2(\text{OH})]^-$                                               | 0.09               | 657.84         | 657.85           |
| $[\text{Co}_3\text{L}(\text{HCOO})_2(\text{CH}_3\text{O})]^-$                                     | 0.11               | 671.86         | 671.86           |
| $[\text{Co}_6\text{L}_3(\text{OH})_2]^{2-}$                                                       | 1                  | 754.87         | 754.87           |
| $[\text{Co}_6\text{L}_3(\text{OH})(\text{CH}_3\text{O})]^{2-}$                                    | 0.65               | 761.88         | 761.88           |
| $[\text{Co}_6\text{L}_3(\text{CH}_3\text{O})_2]^{2-}$                                             | 0.15               | 768.89         | 768.89           |
| $[\text{Co}_9\text{L}_3(\text{EgO}_2\text{H})_5(\text{OH})(\text{CH}_3\text{O})-\text{H}]^{2-}$   | 0.20               | 1002.34        | 1002.35          |
| $[\text{Co}_9\text{L}_3(\text{EgO}_2\text{H})_6-2\text{H}]^{2-}$                                  | 0.28               | 1008.35        | 1008.35          |
| $[\text{Co}_9\text{L}_3(\text{EgO}_2\text{H})_5(\text{CH}_3\text{O})(\text{HCOO})-\text{H}]^{2-}$ | 0.20               | 1016.34        | 1016.35          |
| $[\text{Co}_9\text{L}_3(\text{EgO}_2\text{H})_5(\text{HCOO})_2-\text{H}]^{2-}$                    | 0.14               | 1023.34        | 1023.34          |

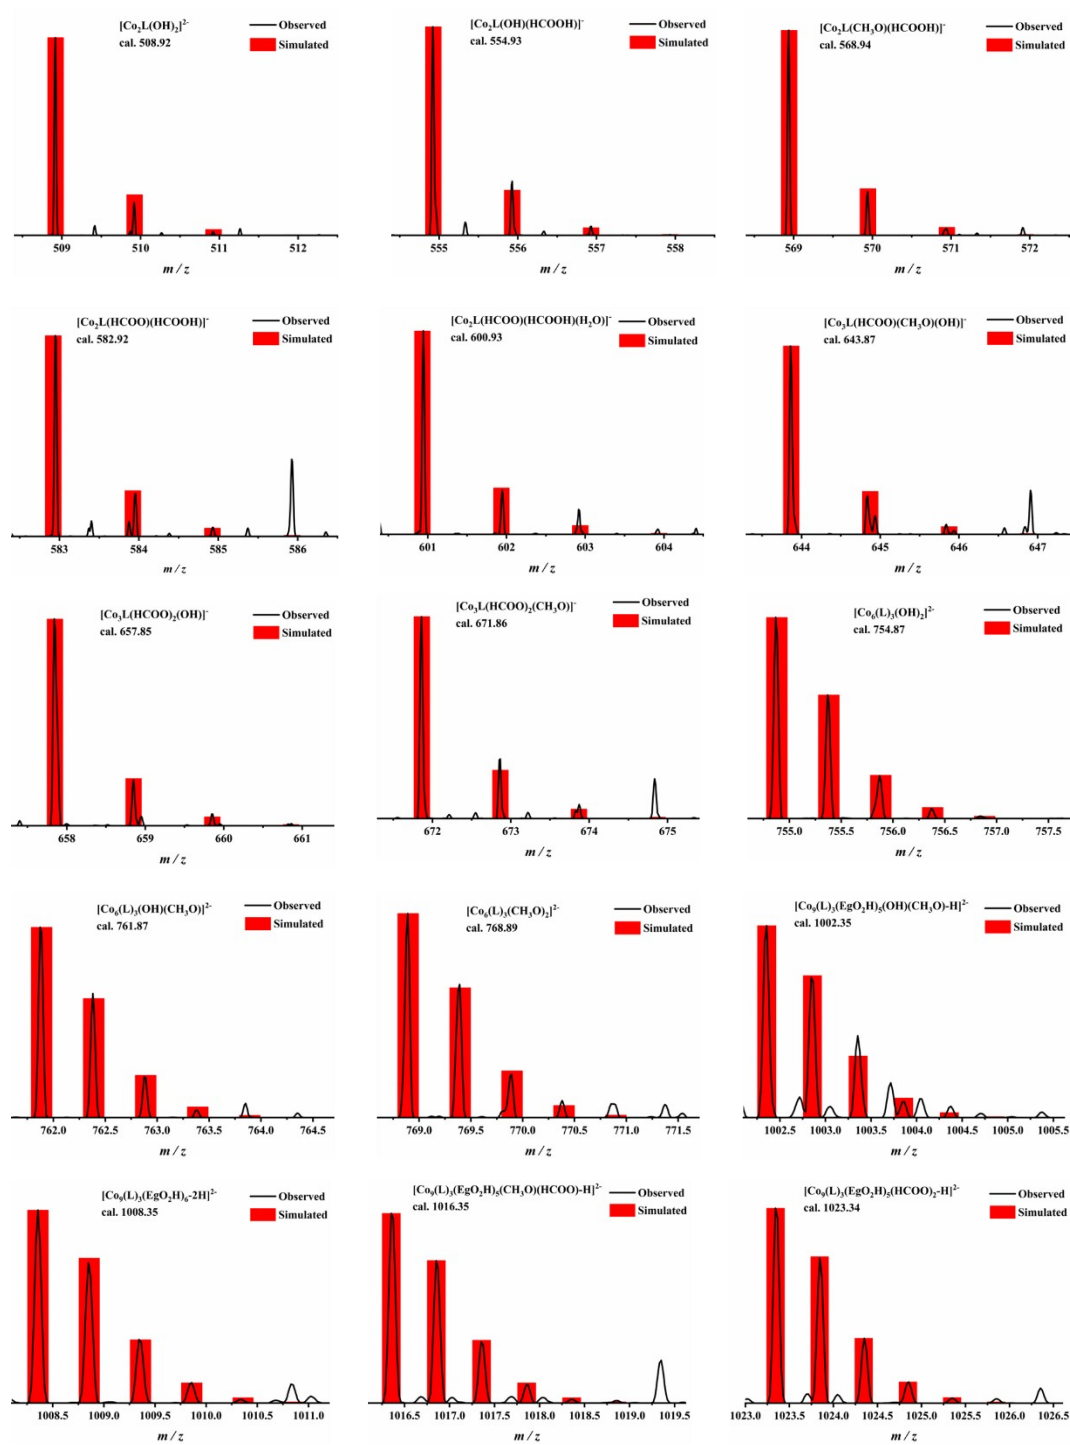

**Fig. S8** The superposed simulated and observed spectra of ESI-MS species for  $\{\text{Co}_9\}$ -Eg in negative mode (In-Source CID = 0 eV).

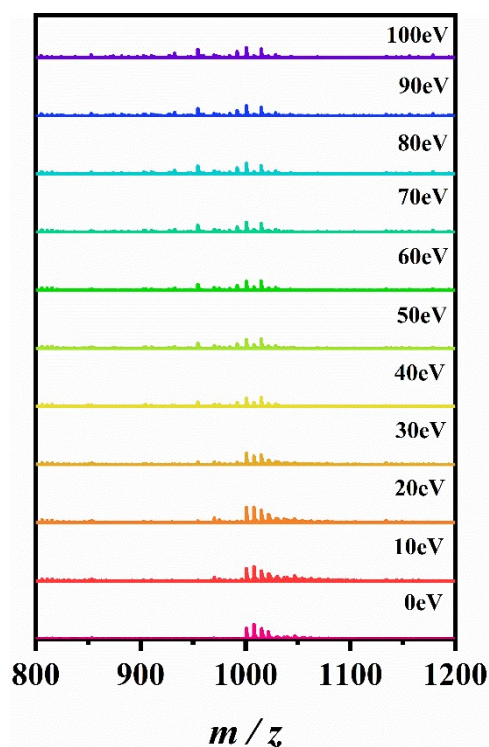

**Fig. S9** Ion peaks of  $\{\text{Co}_9\}$ -Eg in anion modes obtained by ESI-MS test with different ion source voltages (0-100 eV).

**Table S5.** Time-dependent ESI-MS spectra assigned in the HRESI-MS of  $\{\text{Co}_9\}$ -Eg in negative mode.

|                                | m/z     | Fragment                                                                                  | Relative Intensity |        |        |      |      |      |
|--------------------------------|---------|-------------------------------------------------------------------------------------------|--------------------|--------|--------|------|------|------|
|                                |         |                                                                                           | 5 min              | 15 min | 30 min | 1 h  | 2 h  | 4 h  |
| CoL                            | 390.00  | $[\text{CoL}]^-$<br>Cal. 390.00                                                           | 0.15               | 0.20   | 0.11   | 0.05 | 0.04 | 0.04 |
| Co <sub>2</sub> L              | 508.92  | $[\text{Co}_2\text{L}(\text{OH})]^-$<br>Cal. 508.92                                       | 0.41               | 0.38   | 0.22   | 0.18 | 0.18 | 0.16 |
|                                | 522.93  | $[\text{Co}_2\text{L}(\text{CH}_3\text{O})]^-$<br>Cal. 522.94                             | 1                  | 1      | 1      | 1    | 1    | 1    |
| Co <sub>3</sub> L              | 583.85  | $[\text{Co}_3\text{L}(\text{OH})_2\text{-H}]^-$<br>Cal. 583.85                            | 0.02               | 0.05   | 0.05   | 0.03 | 0    | 0    |
|                                | 597.86  | $[\text{Co}_3\text{L}(\text{CH}_3\text{O})(\text{OH})\text{-H}]^-$<br>Cal. 597.86         | 0.07               | 0.10   | 0.20   | 0.11 | 0    | 0    |
|                                | 611.88  | $[\text{Co}_3\text{L}(\text{CH}_3\text{O})_2\text{-H}]^-$<br>Cal. 611.88                  | 0.10               | 0.18   | 0.28   | 0.17 | 0.04 | 0.06 |
| Co <sub>5</sub> L <sub>2</sub> | 1107.79 | $[\text{Co}_5\text{L}_2(\text{CH}_3\text{O})(\text{OH})_2]^-$<br>Cal. 1107.79             | 0                  | 0      | 0      | 0.06 | 0.04 | 0.03 |
|                                | 1135.82 | $[\text{Co}_5\text{L}_2(\text{CH}_3\text{O})_3]^-$<br>Cal. 1135.82                        | 0                  | 0      | 0.05   | 0.20 | 0.11 | 0.08 |
| Co <sub>6</sub> L <sub>3</sub> | 807.91  | $[\text{Co}_6\text{L}_3(\text{EgO}_2\text{H})_2(\text{H}_2\text{O})]^{2-}$<br>Cal. 807.91 | 0                  | 0      | 0      | 0.06 | 0.12 | 0.07 |



|                         |         |                                                                                                                 |   |   |   |      |      |      |
|-------------------------|---------|-----------------------------------------------------------------------------------------------------------------|---|---|---|------|------|------|
|                         | 814.92  | $[\text{Co}_6\text{L}_3(\text{EgO}_2\text{H})_2(\text{CH}_3\text{OH})]^{2-}$<br>Cal. 814.92                     | 0 | 0 | 0 | 0.18 | 0.09 | 0.06 |
|                         | 1616.83 | $[\text{Co}_6\text{L}_3(\text{EgO}_2\text{H}_2)_2(\text{H}_2\text{O})\text{-H}]^-$<br>Cal. 1616.83              | 0 | 0 | 0 | 0.04 | 0.03 | 0    |
|                         | 1630.84 | $[\text{Co}_6\text{L}_3(\text{EgO}_2\text{H}_2)_2(\text{CH}_3\text{OH})\text{-H}]^-$<br>Cal. 1630.84            | 0 | 0 | 0 | 0.20 | 0.10 | 0.11 |
|                         | 1705.91 | $[\text{Co}_6\text{L}_3(\text{EgO}_2\text{H}_2)_3(\text{Me}_2\text{NH})\text{-H}]^-$<br>Cal. 1705.91            | 0 | 0 | 0 | 0.12 | 0.07 | 0.07 |
| $\text{Co}_7\text{L}_3$ | 874.40  | $[\text{Co}_7\text{L}_3(\text{EgO}_2\text{H})_3(\text{CH}_3\text{O})]^{2-}$<br>Cal. 874.40                      | 0 | 0 | 0 | 0    | 0.03 | 0.07 |
| $\text{Co}_9\text{L}_3$ | 1002.35 | $[\text{Co}_9\text{L}_3(\text{EgO}_2\text{H})_5(\text{OH})(\text{CH}_3\text{O})\text{-H}]^{2-}$<br>Cal. 1002.35 | 0 | 0 | 0 | 0    | 0.04 | 0.10 |
|                         | 1008.35 | $[\text{Co}_9\text{L}_3(\text{EgO}_2\text{H})_6\text{-2H}]^{2-}$<br>Cal. 1008.35                                | 0 | 0 | 0 | 0    | 0.08 | 0.14 |
|                         | 1030.88 | $[\text{Co}_9\text{L}_3(\text{EgO}_2\text{H})_6(\text{Me}_2\text{NH})\text{-2H}]^{2-}$<br>Cal. 1030.88          | 0 | 0 | 0 | 0    | 0.06 | 0.07 |

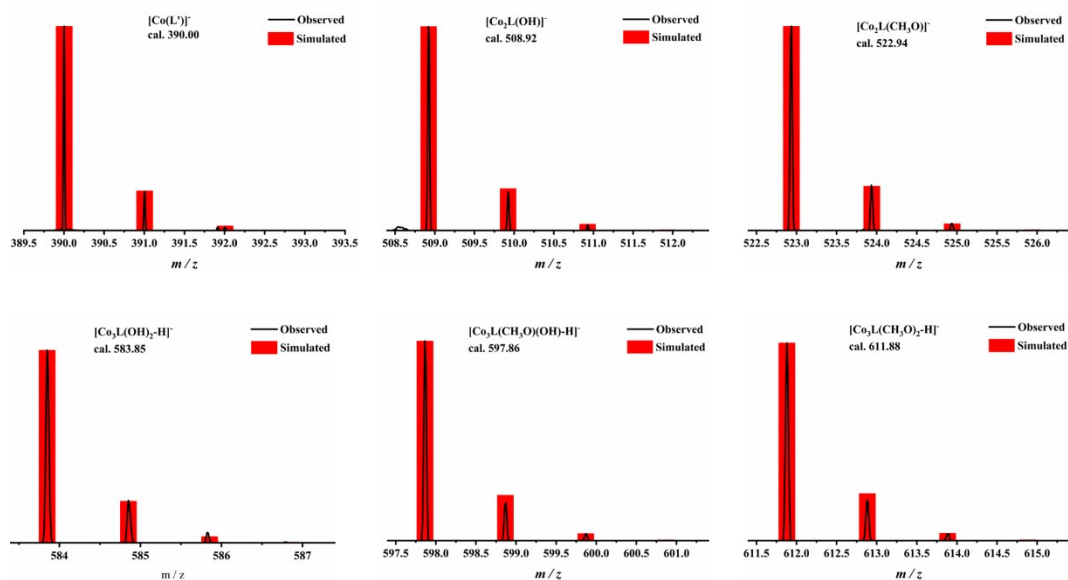

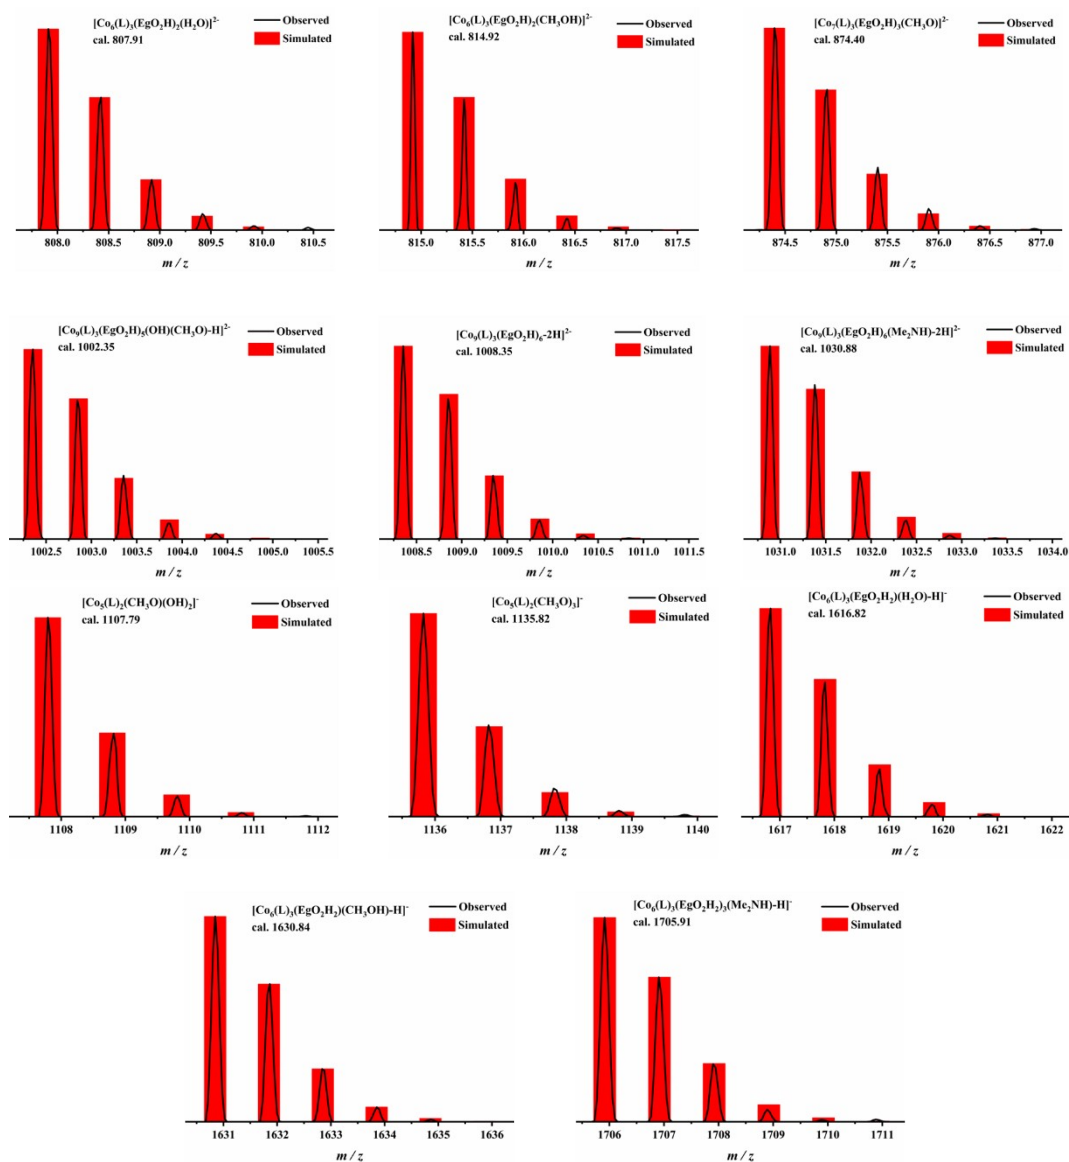

**Fig. S10** The superposed simulated and observed spectra of time-dependent ESI-MS species for  $\{Co_9\}$ -Eg in negative mode.

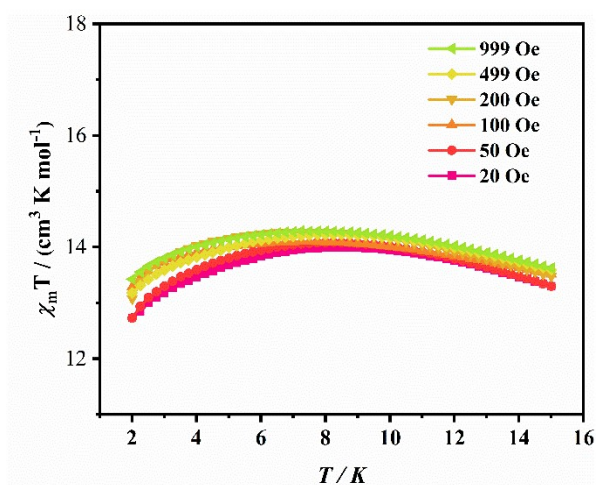

**Fig. S11** The field-cold susceptibility from 2 to 15 K at different magnetic fields.

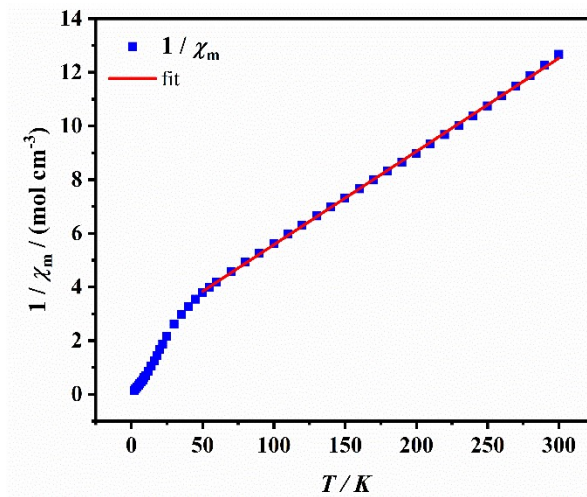

**Fig. S12** Calculated (red solid line) and experimental (blue square dot) data of  $1/\chi_M$  of  $\{Co_9\}$ -Eg.

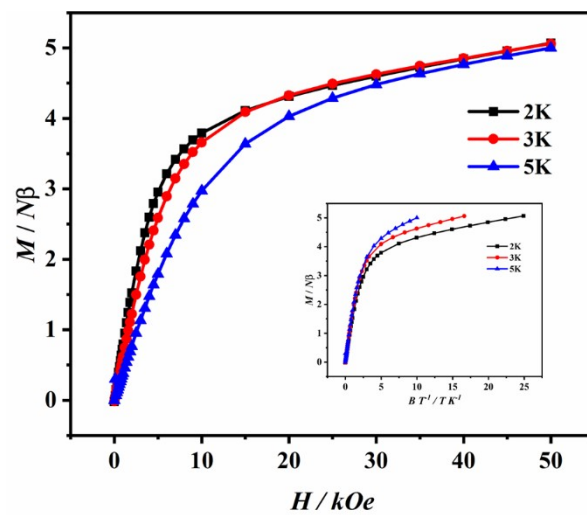

**Fig. S13.** Field dependence of magnetization for  $\{Co_9\}$ -Eg. Inset:  $M$  versus  $H/T$  plot for  $\{Co_9\}$ -Eg.

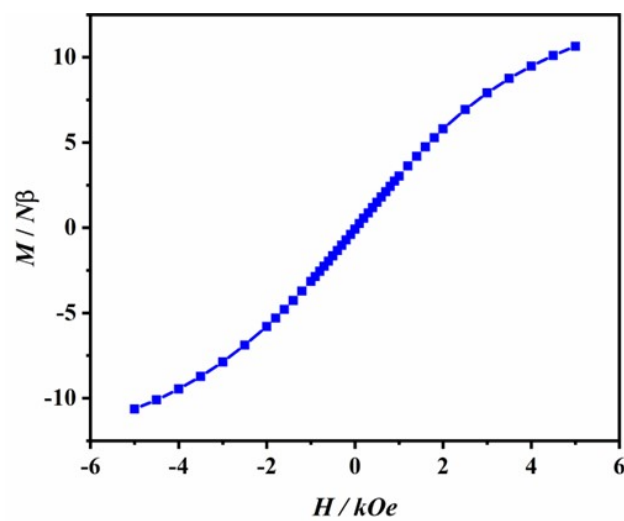

**Fig S14.** Variable magnetic field magnetization measurement for  $\{Co_9\}$ -Eg at 2 K.

**Table S6.** Best fit parameters of the generalized Debye model at temperature ranging from 2 to 5 K under a 0 Oe DC field for {Co<sub>9</sub>}-Eg.  $\chi_T$  stands for the isothermal susceptibility,  $\chi_S$  for the adiabatic susceptibility,  $\alpha$  for the relaxation time, and  $\tau$  accounts for the distribution width of the relaxation time.

|     | $\chi_S / \text{cm}^3\text{mol}^{-1}\text{K}$ | $\chi_T / \text{cm}^3\text{mol}^{-1}\text{K}$ | $\tau / \text{s}$ | $\alpha$ |
|-----|-----------------------------------------------|-----------------------------------------------|-------------------|----------|
| 2.0 | 0.71464                                       | 4.77452                                       | 0.00164           | 0.45234  |
| 2.3 | 0.65316                                       | 4.17136                                       | 0.0016            | 0.44468  |
| 2.6 | 0.63446                                       | 3.70872                                       | 0.00153           | 0.42442  |
| 2.9 | 0.6736                                        | 3.31546                                       | 0.00134           | 0.36403  |
| 3.2 | 0.69055                                       | 2.9846                                        | 9.2461E-4         | 0.27992  |
| 3.5 | 0.67746                                       | 2.71826                                       | 5.30826E-4        | 0.20821  |
| 3.8 | 0.67763                                       | 2.50096                                       | 2.85496E-4        | 0.15523  |
| 4.1 | 0.7078                                        | 2.31939                                       | 1.56076E-4        | 0.11502  |
| 4.4 | 0.73099                                       | 2.15968                                       | 8.64443E-5        | 0.07967  |
| 4.7 | 0.83374                                       | 2.03059                                       | 5.34317E-5        | 0.04784  |
| 5.0 | 0.94051                                       | 1.91396                                       | 3.40955E-5        | 0.02379  |

**Squeeze results for {Co<sub>9</sub>}-Eg is as follows:**

```
loop_
  _platon_squeeze_void_nr
  _platon_squeeze_void_average_x
  _platon_squeeze_void_average_y
  _platon_squeeze_void_average_z
  _platon_squeeze_void_volume
  _platon_squeeze_void_count_electrons
  _platon_squeeze_void_content
  1 0.000 0.000 0.000 72 15 ''
  2 0.000 0.000 0.097 36 3 ''
  3 0.000 0.444 0.250 11 5 ''
  4 0.000 0.000 0.403 36 3 ''
  5 0.000 0.000 0.500 72 15 ''
  6 0.000 0.000 0.597 36 3 ''
  7 0.000 0.556 0.750 11 5 ''
  8 0.000 0.000 0.903 36 3 ''
  9 0.111 0.778 0.083 9 5 ''
  10 0.111 0.333 0.583 9 5 ''
  11 0.222 0.333 0.083 9 5 ''
  12 0.333 0.667 0.167 73 16 ''
  13 0.222 0.889 0.583 9 5 ''
  14 0.333 0.667 0.667 73 15 ''
  15 0.333 0.667 0.263 35 3 ''
  16 0.333 0.667 0.763 35 3 ''
  17 0.333 0.667 0.070 35 3 ''
```

|    |       |       |       |    |      |
|----|-------|-------|-------|----|------|
| 18 | 0.333 | 0.667 | 0.570 | 35 | 3''  |
| 19 | 0.333 | 0.222 | 0.417 | 9  | 5''  |
| 20 | 0.333 | 0.111 | 0.917 | 9  | 5''  |
| 21 | 0.444 | 1.000 | 0.250 | 11 | 5''  |
| 22 | 0.444 | 0.444 | 0.750 | 11 | 5''  |
| 23 | 0.555 | 0.556 | 0.250 | 11 | 5''  |
| 24 | 0.667 | 0.333 | 0.333 | 72 | 15'' |
| 25 | 0.555 | 0.000 | 0.750 | 11 | 5''  |
| 26 | 0.667 | 0.333 | 0.833 | 72 | 15'' |
| 27 | 0.667 | 0.333 | 0.430 | 35 | 3''  |
| 28 | 0.667 | 0.333 | 0.930 | 35 | 3''  |
| 29 | 0.667 | 0.333 | 0.237 | 35 | 3''  |
| 30 | 0.667 | 0.333 | 0.737 | 35 | 3''  |
| 31 | 0.667 | 0.889 | 0.083 | 10 | 5''  |
| 32 | 0.667 | 0.778 | 0.583 | 10 | 5''  |
| 33 | 0.778 | 0.111 | 0.417 | 9  | 5''  |
| 34 | 0.778 | 0.667 | 0.917 | 10 | 5''  |
| 35 | 0.889 | 0.667 | 0.417 | 10 | 5''  |
| 36 | 0.889 | 0.222 | 0.917 | 9  | 5''  |

That is, SQUEEZE gives 217 electrons/unit cell for the voids. If these electrons are all from H<sub>2</sub>O (10e<sup>-</sup>), each unit cell has 217/10 ≈ 22 H<sub>2</sub>O molecules, and each formula unit has 3.5 H<sub>2</sub>O molecules (since Z = 6). So the suitable formula for this compound should be **[Co<sub>9</sub>L<sub>3</sub>(CH<sub>2</sub>OCH<sub>2</sub>OH)<sub>6</sub>]·3.5H<sub>2</sub>O**
